# Supplementary material for: Solution and thermal behaviour of novel dicationic imidazolium ionic liquids
Source: Royal Society of Chemistry journal article supplement (doi:10.1039/c3ob40807h), 2013-01-01
Supplement: c3ob40807h.pdf [file c3ob40807h.pdf]

## Electronic Supplementary Information

### Solution and Thermal behaviour of Novel Dicationic Imidazolium Ionic Liquids

**Francesca D'Anna,\* H. Q. Nimal Gunaratne, Giuseppe Lazzara, Renato Noto,\* Carla Rizzo  
and Kenneth R. Seddon**

- Figure 1:**  $^1\text{H}$  NMR spectra in  $\text{dms-}d_6$  solution (0.038 M) in the range 300-390 K. Pages 2-6
- Figure 2:** 2D NOESY spectra of diimidazolium salts having aromatic dianions. Pages 7
- Figure 3:** DSC traces of dicationic functionalised salts. Pages 8
- Figure 4:** traces of TGA measurements. Pages 9
- Figure 5:** Plot of NMR linear correlation parameters as a function of  $\Delta H_m$  values corresponding to dicationic functionalised salts **2a-i**. Page 10

**Figure 1a:**  $[2C_8bti][Br]_2$  (**2a**)

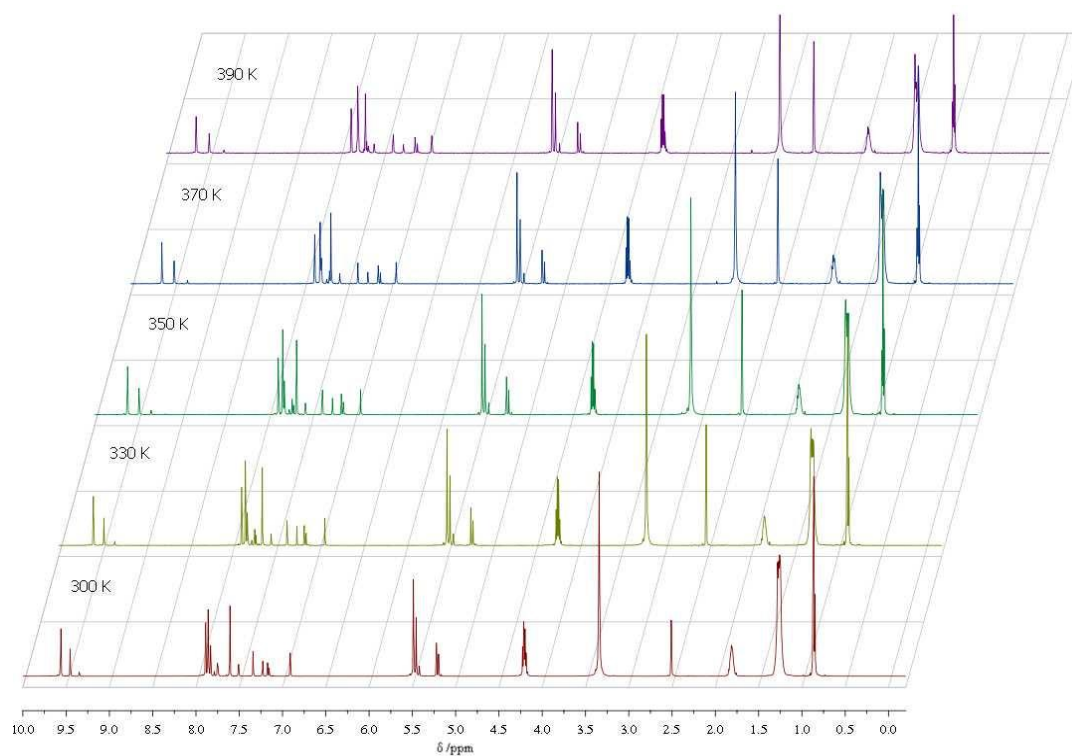

**Figure 1b:**  $[2C_8bti][BF_4]_2$  (**2b**)

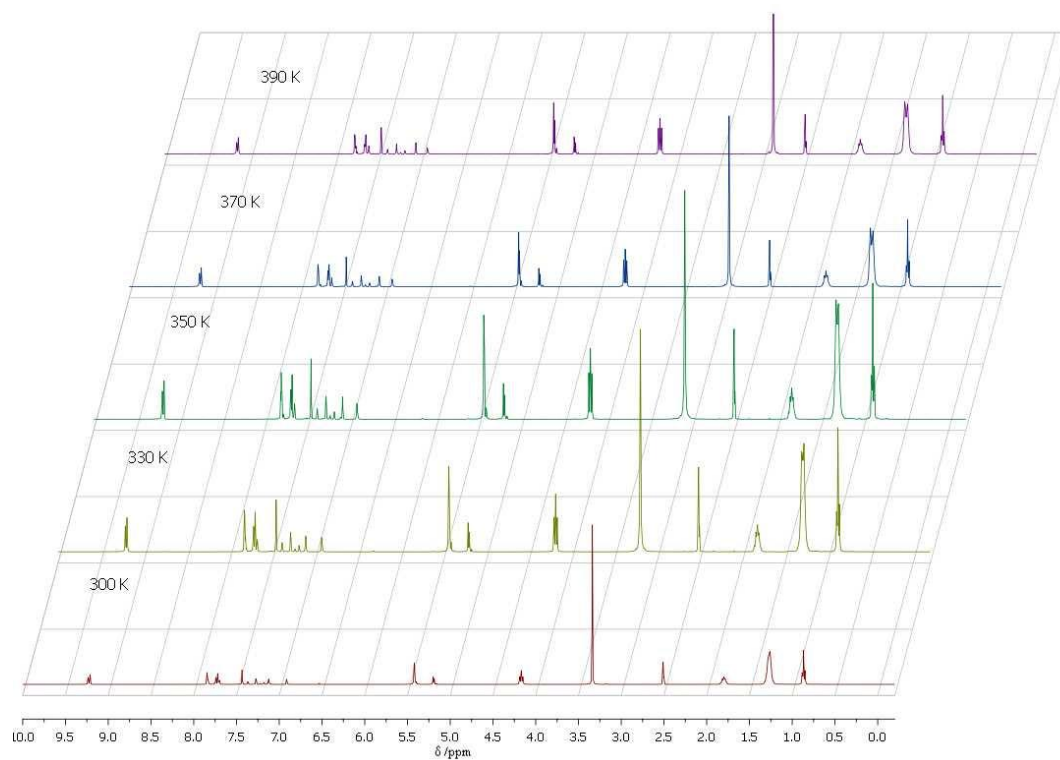

**Figure 1c:**  $[2C_8bti][NTf_2]_2$  (**2c**)

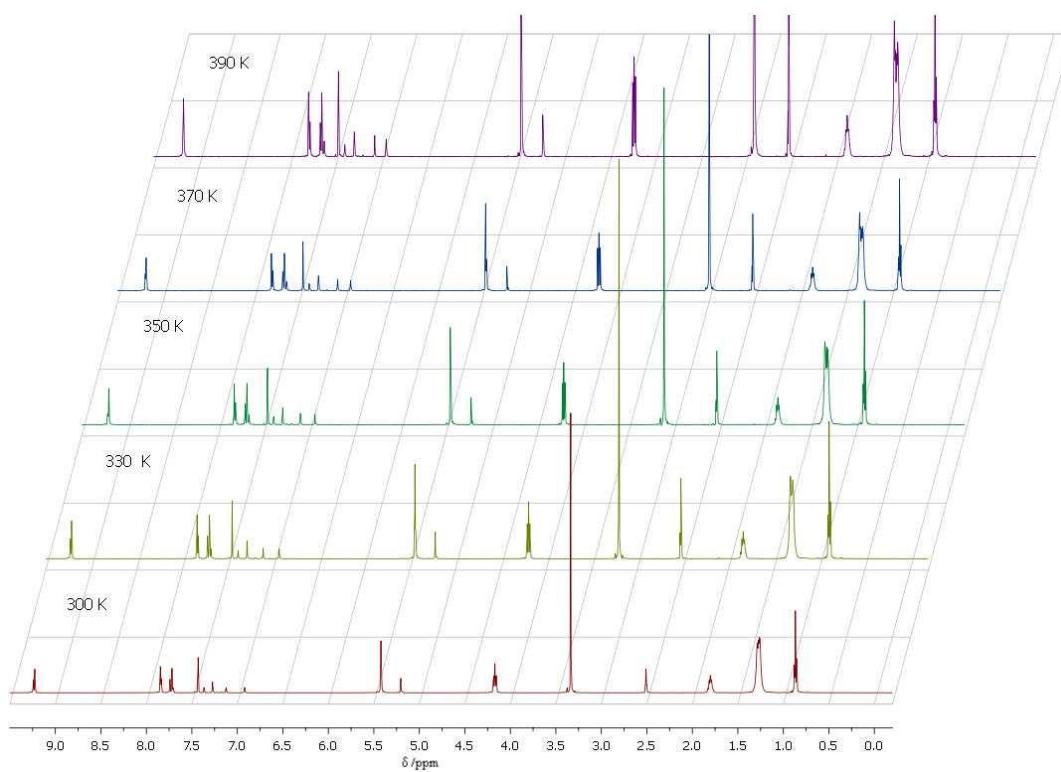

**Figure 1d:**  $[2C_8bti][2,6-nds]$  (**2e**)

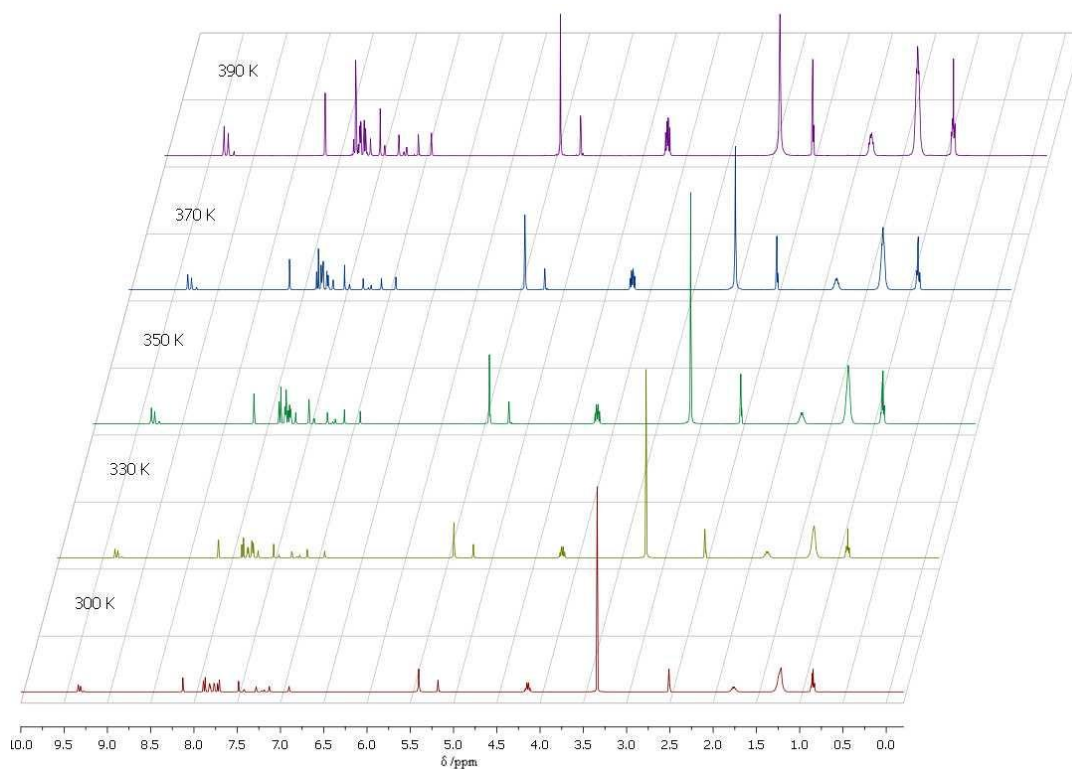

**Figure 1e:** [2C<sub>8</sub>bti][1,4-bdc] (**2f**)

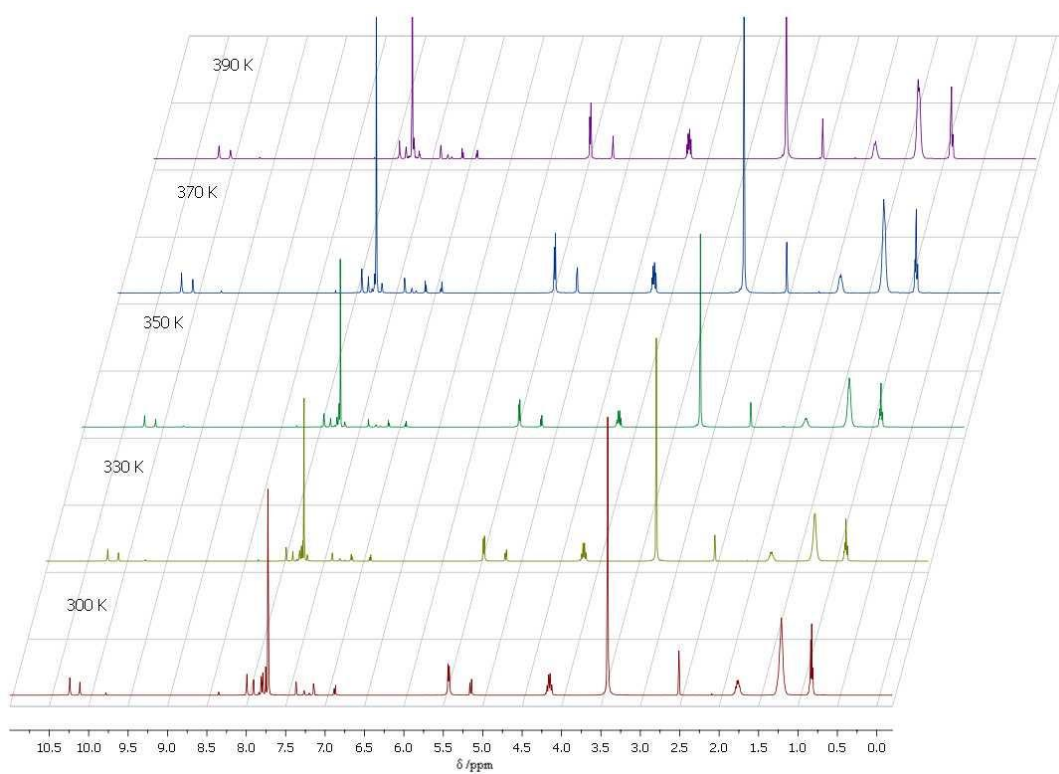

**Figure 1f:** [2C<sub>8</sub>bti][2,6-ndc] (**2g**)

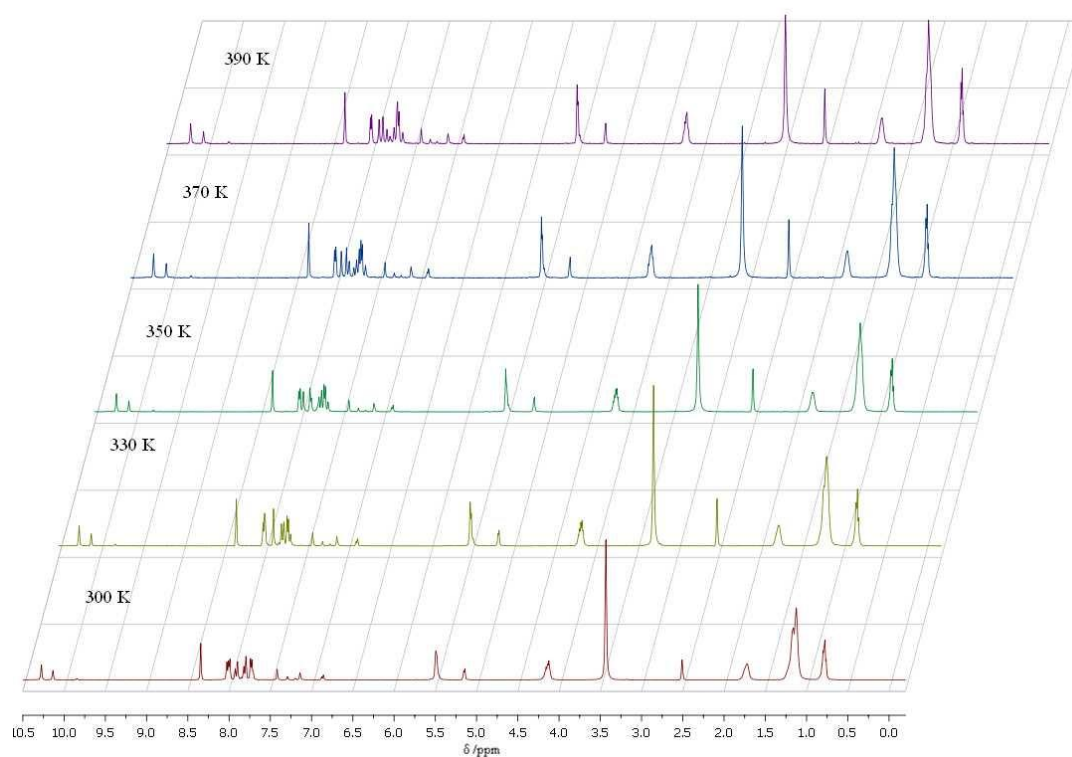

**Figure 1g:**  $[2C_8bti][ad]$  (**2h**)

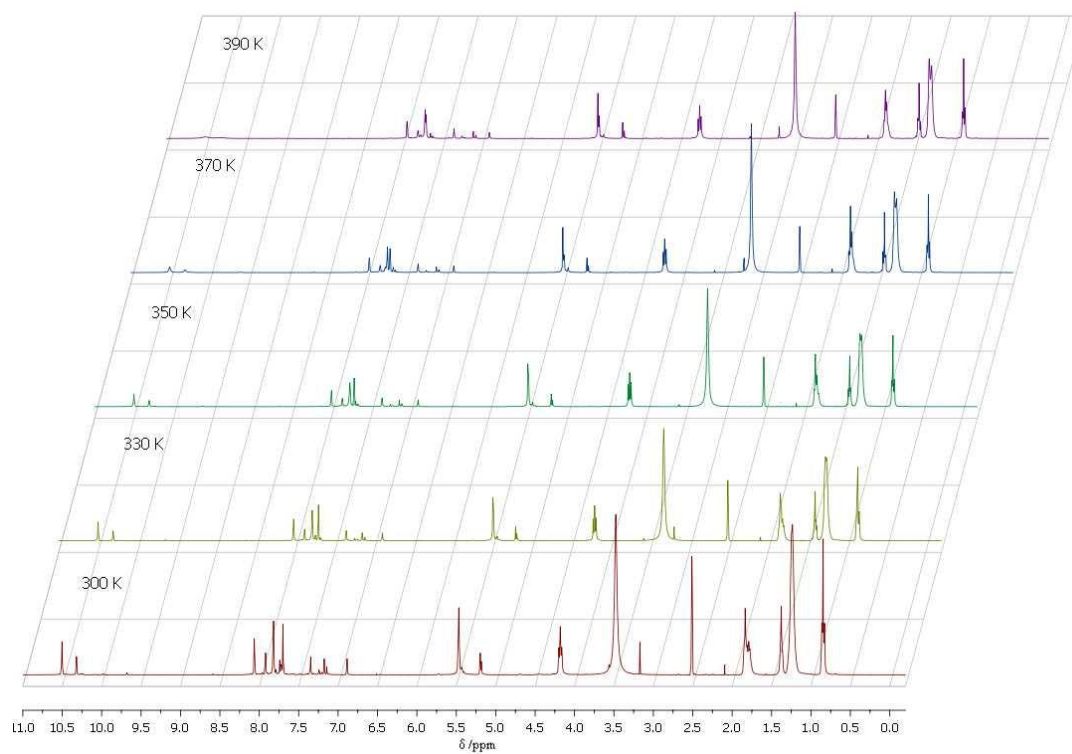

**Figure 1h:** Expanded regions for  $[2C_8bti][ad]$  (**2h**)

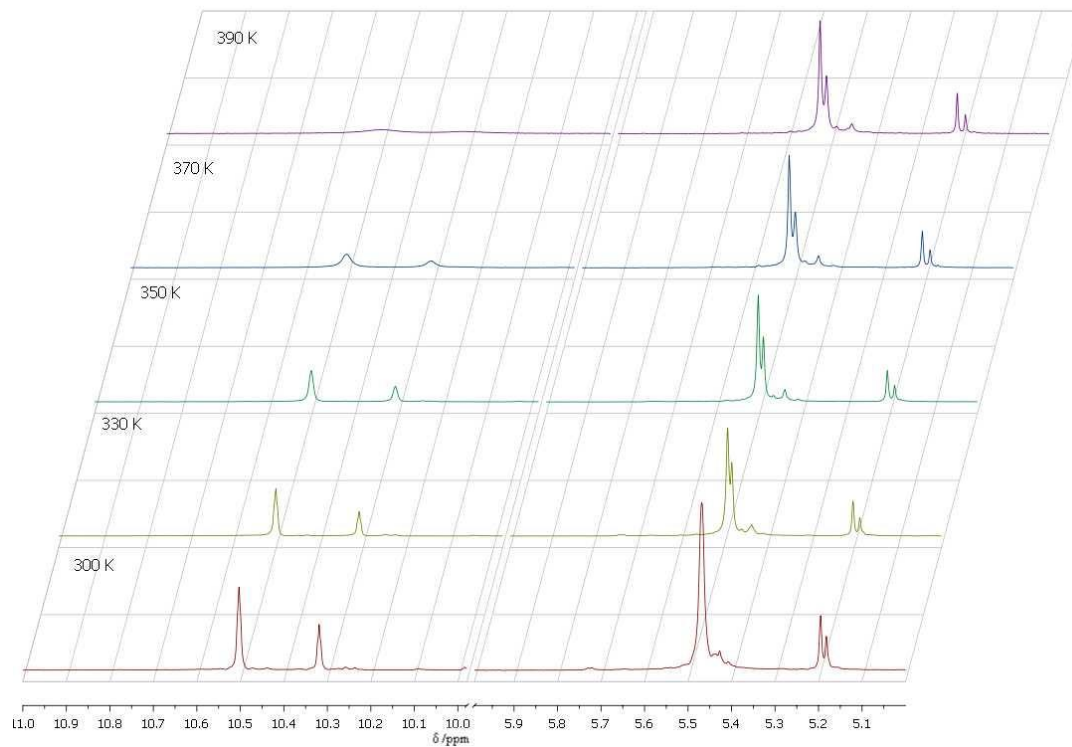

**Figure 1i:** [2C<sub>8</sub>bt<sub>i</sub>]<sub>[sub]</sub> (**2i**)

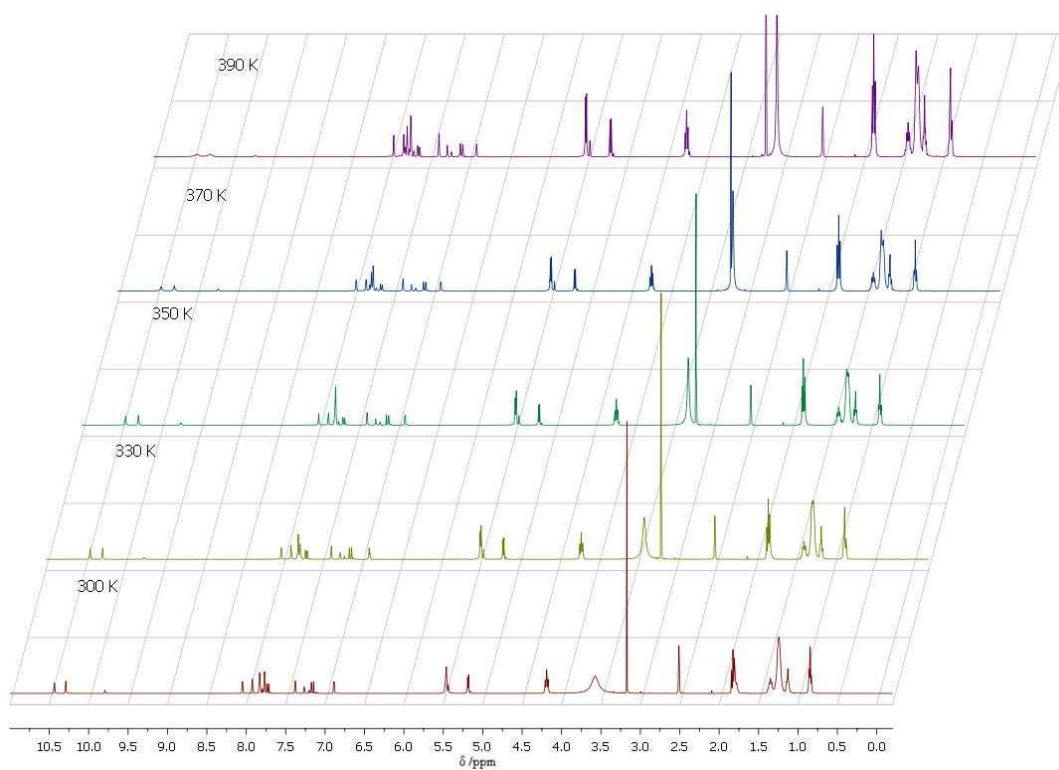

**Figure 1l:** Expanded regions for [2C<sub>8</sub>bt<sub>i</sub>]<sub>[sub]</sub> (**2i**)

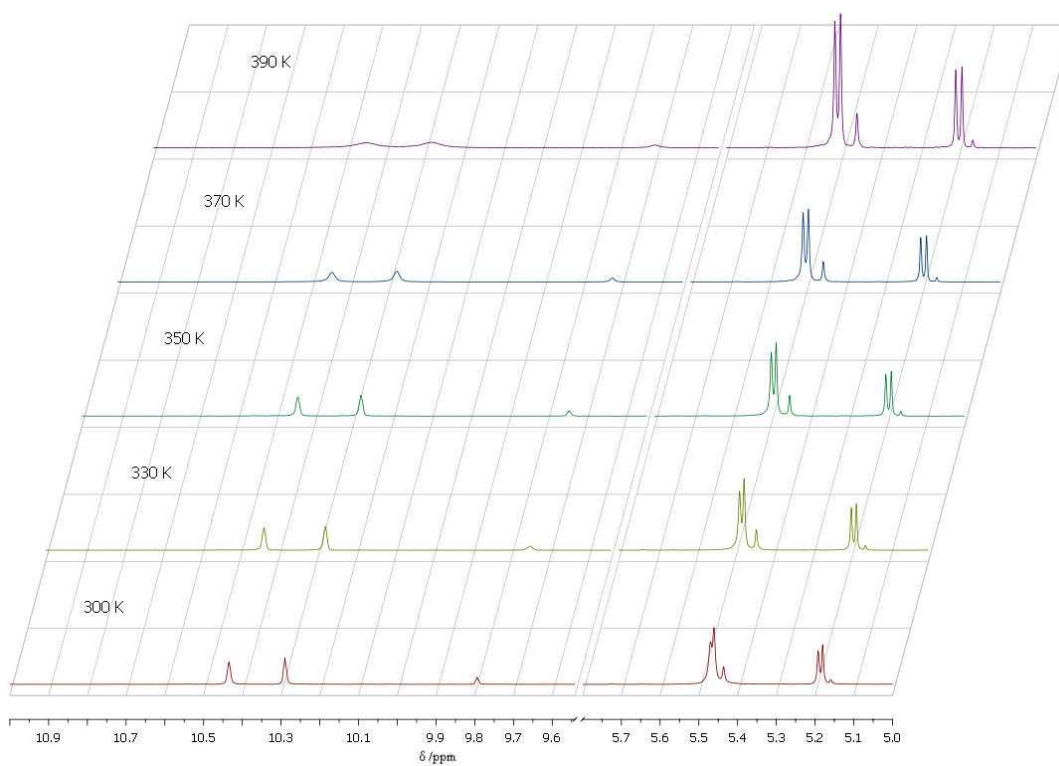

**Figure 1:** <sup>1</sup>H NMR spectra in dms0-d<sub>6</sub> solution (0.038 M) in the range 300-390 K relevant to dicationic functionalised salts **2a-i**.

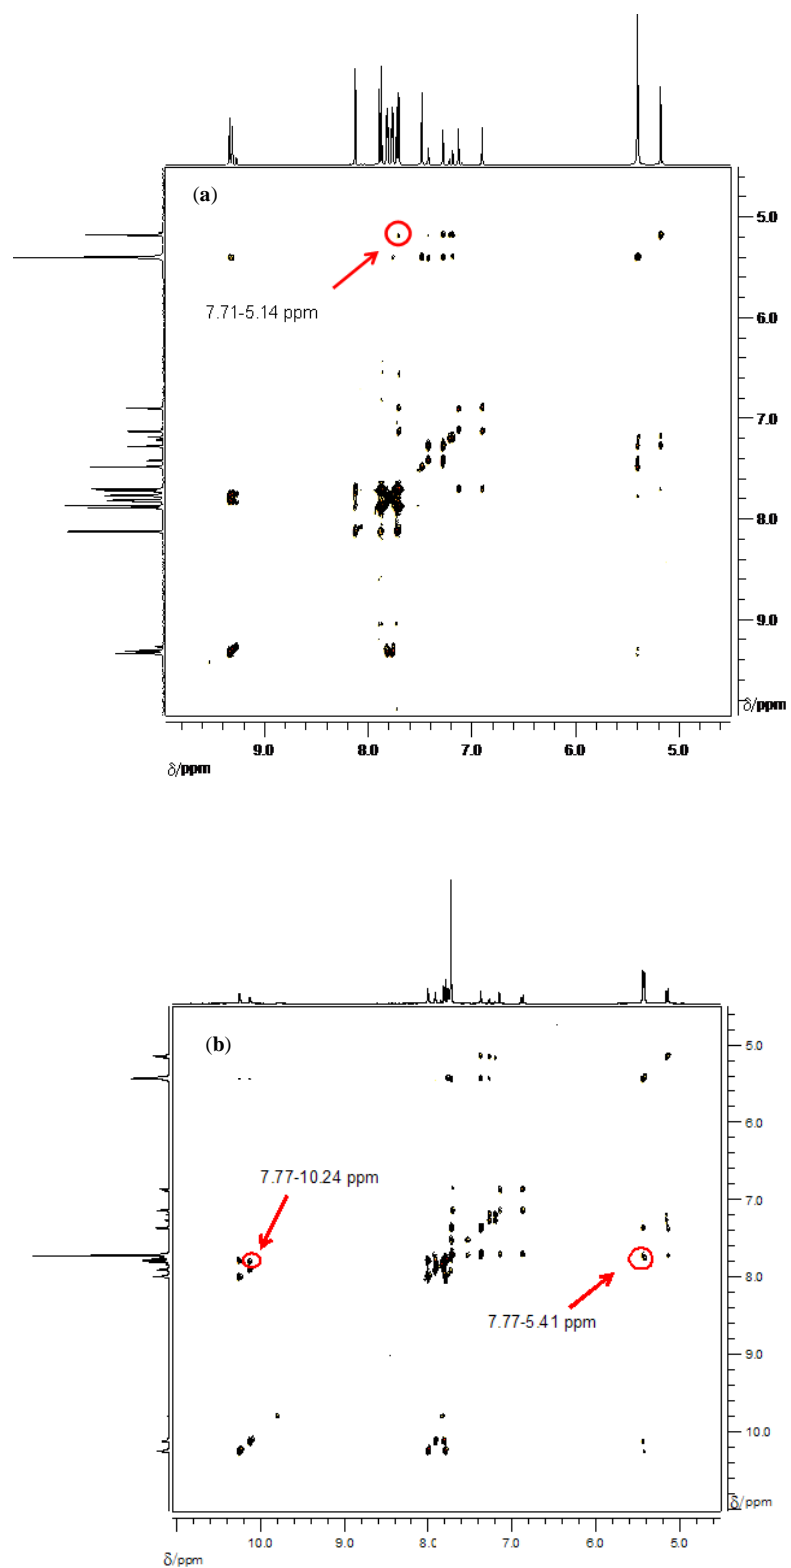

**Figure 2.** 2D NOESY spectra of dicationic functionalised salts: (a)  $[2C_8bti][2,6-nds]$  (**2e**); (b)  $[2C_8bti][1,4-bdc]$  (**2f**).

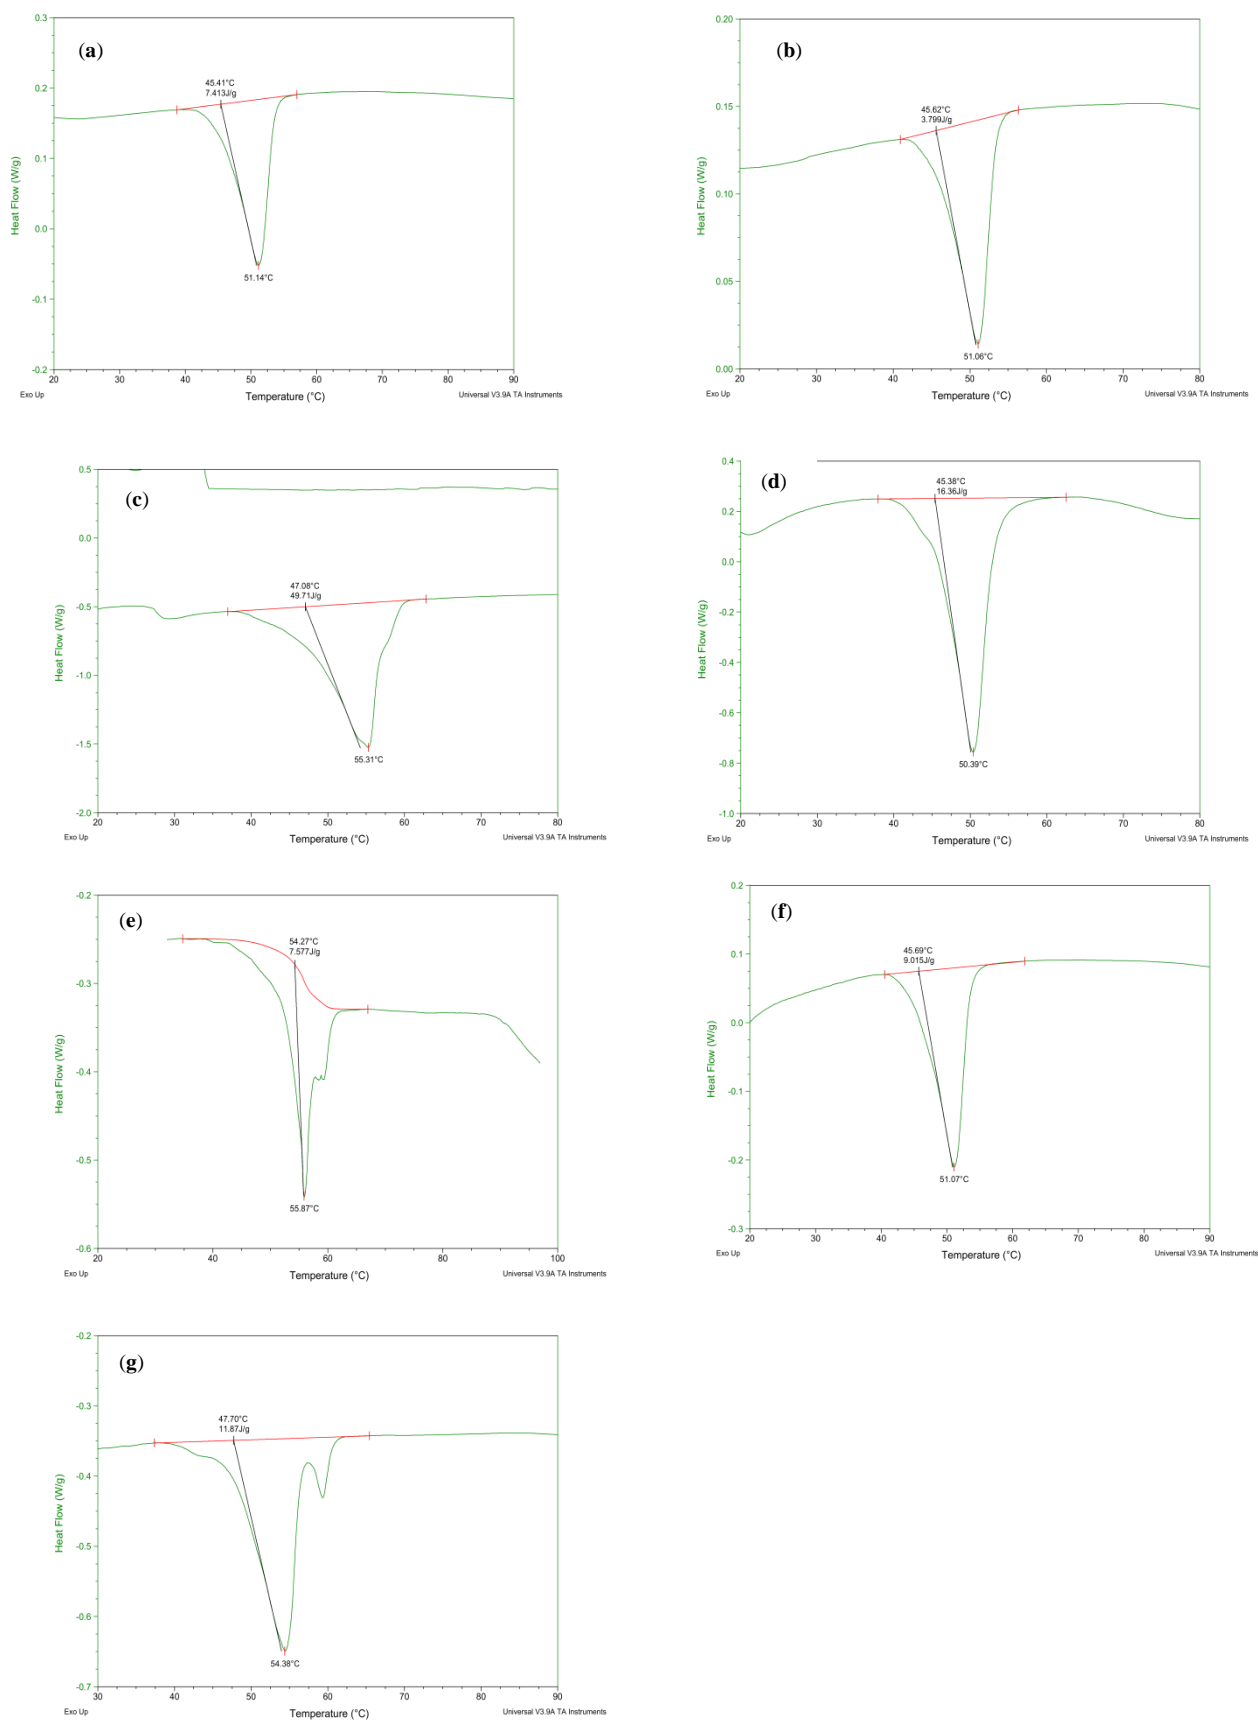

**Figure 3.** DSC traces of dicationic functionalised salts: (a) [2C<sub>8</sub>bti][BF<sub>4</sub>]<sub>2</sub> (2b); (b) [2C<sub>8</sub>bti][NTf<sub>2</sub>]<sub>2</sub> (2c); (c) [2C<sub>8</sub>bti][1,5-nds] (2d); (d) [2C<sub>8</sub>bti][[2,6-nds] (2e); (e) [2C<sub>8</sub>bti][1,4-bdc] (2f); (f) [2C<sub>8</sub>bti][ad] (2h); (g) [2C<sub>8</sub>bti][sub] (2i).



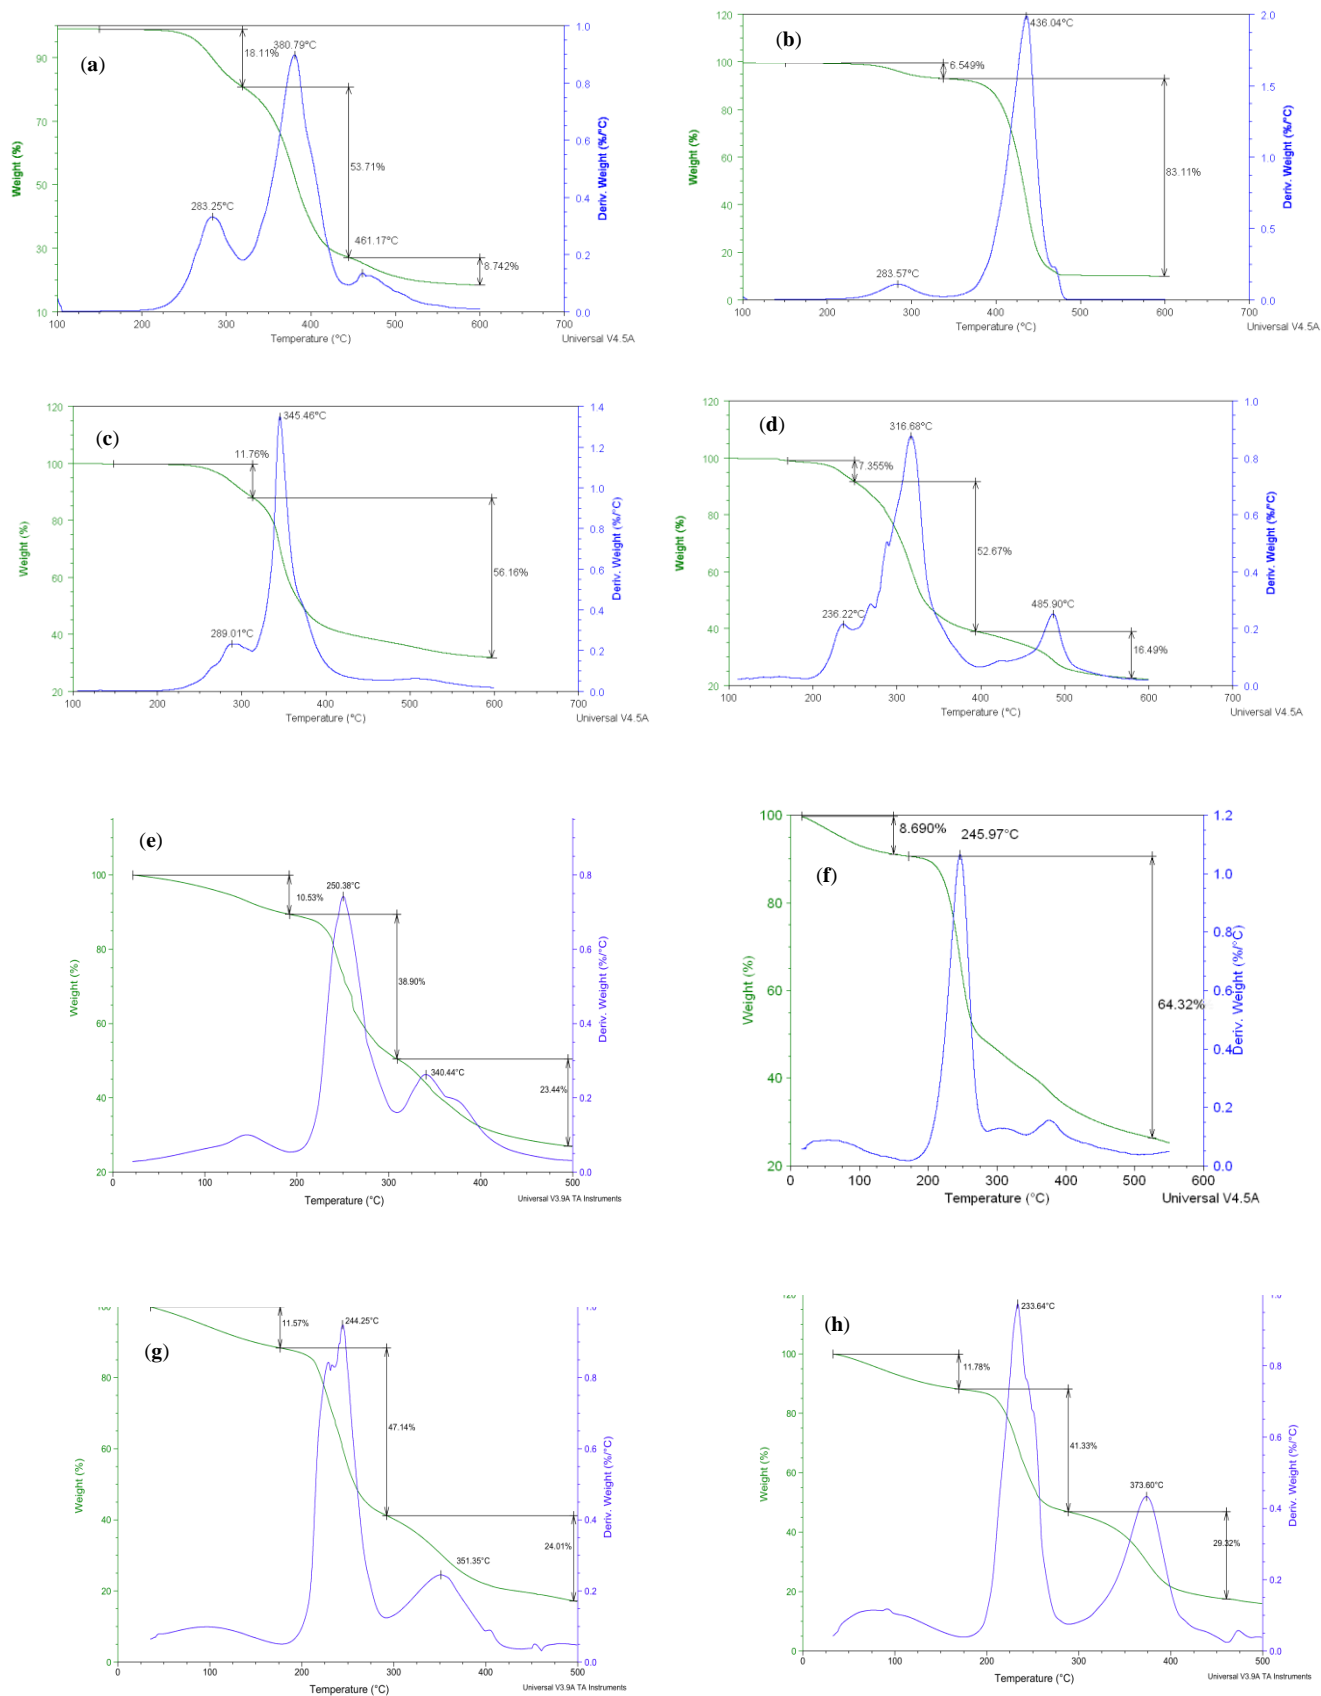

**Figure 4.** Traces of TGA measurements relevant to dicationic functionalised salts: (a) [2C<sub>8</sub>bti][BF<sub>4</sub>]<sub>2</sub> (**2b**); (b) [2C<sub>8</sub>bti][NTf<sub>2</sub>]<sub>2</sub> (**2c**); (c) [2C<sub>8</sub>bti][1,5-nds] (**2d**); (d) [2C<sub>8</sub>bti][[2,6-nds]] (**2e**); (e) [2C<sub>8</sub>bti][1,4-bdc] (**2f**); (f) [2C<sub>8</sub>bti][2,6-ndc] (**2g**); (g) [2C<sub>8</sub>bti][ad] (**2h**); (h) [2C<sub>8</sub>bti][sub] (**2i**).

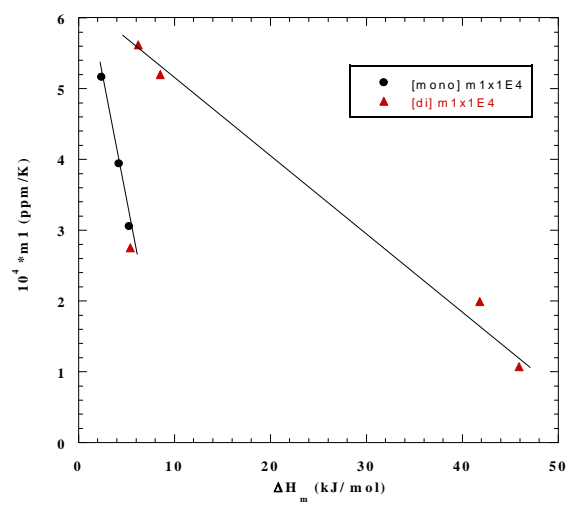

**Figure 5.** Plot of NMR linear correlation parameters as a function of  $\Delta H_m$  values corresponding to dicationic functionalised salts.
